# Supplementary material for: Seed culture pre-adaptation of Bacillus coagulans MA-13 improves lactic acid production in simultaneous saccharification and fermentation
Source: Biotechnol Biofuels. 2019 Feb 28;12:45. doi: 10.1186/s13068-019-1382-2 (PMC6394018; doi:10.1186/s13068-019-1382-2)
Supplement: Supplementary file 1 — Additional file 1. Raw data and calculations of yield coefficients and production rates. [file 13068_2019_1382_MOESM1_ESM.xlsx]

## Sheet: Summary of Excel file
Calculations of yield coefficients and production rates
Colour		Name	Description
		1 Samples	Raw data of total carbo hydrate analysis including:
				Sample names
				Information on sample origin (process conditions)
				Weight of samples
		2 Raw data HPLC	Raw data of HLC analysis of total carbohydrate analysis samples for t=tend
				Sample names
				Retention time
				Areas, heights and concentrations of samples
		3 Sugar recovery standards	Recovery of glucose throughout two-step hydrolysis hydrolysis process
				Recovery for glucose recovery standards
		4 Amount of released glucose	Calculation of glucose concentrations taking recovery into account
				Calculation of amount of glucose released per g WIS
		5 No pre-adapt. X=5mg	Calculations of yields and productivities for seed with 0 % hydrolysate, 5 mg inoculum
		6 No pre-adapt. X=10mg	Calculations of yields and productivities for seed with 0 % hydrolysate, 10 mg inoculum
		7 30% adapt. X=5mg	Calculations of yields and productivities for seed with 30 % hydrolysate, 5 mg inoculum
		8 30% adapt. X=10	Calculations of yields and productivities for seed with 30 % hydrolysate, 10 mg inoculum
		9 40% adapt., X=5mg	Calculations of yields and productivities for seed with 40 % hydrolysate, 5 mg inoculum
		10 40% adapt. X=10mg	Calculations of yields and productivities for seed with 40 % hydrolysate, 10 mg inoculum
		11 50% adapt. X=10mg	Calculations of yields and productivities for seed with 50 % hydrolysate, 10 mg inoculum
		12 Overview	Overview over all calculations
		13 Additional graphs	Graphs showing lag phase

## Sheet: 1 Samples
Replicate	Week	Date of sampling	% of Hydrolysate in seed culture	WIS in SSF	Name on the tube	Amount of cells [mg/g of WIS]	Weight Tube+cap [g]	Weight Tube+cap+washed and dried slurry (25g) [g]	Weight Dried slurry (WIS) [g]		Weighed quantity for the sugar analysis (sample name) (1)	Weighed quantity for the sugar analysis [mg] (1)	Weighed quantity for the sugar analysis (sample name) (2)	Weighed quantity for the sugar analysis [mg] (2)	Weighed quantity for the sugar analysis (sample name) (3)	Weighed quantity for the sugar analysis [mg] (3)
1	14	2017-04-07	NONE	NONE	Blank 1	NONE	13.86	16.43	2.57		BLK 1-1	60	BLK 1-2	59.8	BLK 1-3	60.1
2	//	//	//	//	Blank 2	//	13.92	16.51	2.59		BLK 2-1	60	BLK 2-2	60.1	BLK 2-3	59.9
3	//	//	//	//	Blank 3	//	13.83	16.49	2.66		BLK 3-1	60	BLK 3-2	60.2	BLK 3-3	60.2
1	4	2017-01-27	0	10% WIS	SSF-0% (1)	5	13.81	15.37	1.56		0% 1-1	60	0% 1-2	60.5	0% 1-3	60.3
2	//	//	//	//	SSF-0% (2)	//	13.89	15.43	1.54		0% 2-1	59.9	0% 2-2	60	0% 2-3	60
3	//	//	//	//	SSF-0% (3)	//	13.89	15.42	1.53		0% 3-1	60.1	0% 3-2	60	0% 3-3	60
1	9	2017-03-03	0	10% WIS	SSF-B1	10	13.89	15.54	1.65		B1-1	59.9	B1-2	60.2	B1-3	60.1
2	//	//	//	//	SSF-B2	//	13.91	15.59	1.68		B2-1	60.1	B2-2	59.8	B2-3	60.2
3	//	//	//	//	SSF-B3	//	13.89	15.57	1.68		B3-1	60.2	B3-2	60	B3-3	60.2
1	14	2017-04-07	0	10% WIS	SSF-A1	10	13.91	15.61	1.7		A2-1	60.1	A2-1	59.8	A1-3	60.4
2	//	//	//	//	SSF-A2	//	13.82	15.55	1.73		A2-1	60	A2-2	60	A2-3	60
3	//	//	//	//	SSF-A3	//	13.83	15.62	1.79		A3-1	59.9	A3-2	59.8	A3-3	60
												Weight (mg)
1	19	2017-05-09	NONE	NONE	Glucose Std 1	NONE	NONE	NONE	NONE		Glc 1	15.1
2	//	//	//	//	Glucose Std 2	//	//	//	//		Glc 2	15.1
3	//	//	//	//	Glucose Std 3	//	//	//	//		Glc 3	15.2
1	14	2017-04-07	30	10% WIS	SSF-B1	5	13.84	15.61	1.77		SSF-B1(1)	60	SSF-B1(2)	60.1	SSF-B1(3)	60
2	//	//	//	//	SSF-B2	//	13.84	15.64	1.8		SSF-B2(1)	60	SSF-B2(2)	60	SSF-B2(3)	60
3	//	//	//	//	SSF-B3	//	13.81	15.6	1.79		SSF-B3(1)	60.1	SSF-B3(2)	60	SSF-B3(3)	60
1	14	2017-04-07	30	10% WIS	SSF-C1	10	13.92	15.8	1.88		SSF-C1(1)	60	SSF-C1(2)	60.1	SSF-C1(3)	60
2	//	//	//	//	SSF-C2	//	13.85	15.65	1.8		SSF-C2(1)	60	SSF-C2(2)	60	SSF-C2(3)	60.1
3	//	//	//	//	SSF-C3	//	13.83	15.73	1.9		SSF-C3(1)	60.1	SSF-C3(2)	60	SSF-C3(3)	60
1	10	2017-03-10	30	10% WIS	SSF-A1	10	13.82	15.95	2.13		SSF-A1(1)	60	SSF-A1(2)	60.1	SSF-A1(3)	60.1
2	//	//	//	//	SSF-A2	//	13.86	16.03	2.17		SSF-A2(1)	60	SSF-A2(2)	60	SSF-A2(3)	60.2
3	//	//	//	//	SSF-A3	//	13.9	16.03	2.13		SSF-A3(1)	60	SSF-A3(2)	60.2	SSF-A3(3)	59.9
												Weight (mg)
1	19	2017-05-10	NONE	NONE	Glucose Std 1	NONE	NONE	NONE	NONE		Glc 1	15.4
2	//	//	//	//	Glucose Std 2	//	//	//	//		Glc 2	14.9
3	//	//	//	//	Glucose Std 3	//	//	//	//		Glc 3	14.9
1	4	2017-01-27	40	10% WIS	SSF-40% (4)	5	13.78	15.35	1.57		SSF-40%(1)	60	SSF-40%(2)	60	SSF-40%(3)	60
2	//	//	//	//	SSF-40% (5)	//	13.85	15.45	1.6		SSF-40%(1)	60	SSF-40%(2)	60	SSF-40%(3)	60
3	//	//	//	//	SSF-40% (6)	//	13.86	15.33	1.47		SSF-40%(1)	60.1	SSF-40%(2)	60	SSF-40%(3)	60
1	11	2017-03-17	40	10% WIS	SSF-A1	10	13.63	15.97	2.34		SSF-A1(1)	60.1	SSF-A1(2)	60	SSF-A1(3)	60.1
2	//	//	//	//	SSF-A2	//	13.72	16.02	2.3		SSF-A2(1)	60.1	SSF-A2(2)	60	SSF-A2(3)	60.1
3	//	//	//	//	SSF-A3	//	13.72	16.12	2.4		SSF-A3(1)	60.1	SSF-A3(2)	60	SSF-A3(3)	60
1	12	2017-03-24	50	10% WIS	SSF-A1	10	13.72	15.63	1.91		SSF-A1(1)	60.2	SSF-A1(2)	60.2	SSF-A1(3)	59.8
2	//	//	//	//	SSF-A2	//	13.72	15.81	2.09		SSF-A2(1)	60.1	SSF-A2(2)	60.1	SSF-A2(3)	60.1
3	//	//	//	//	SSF-A3	//	13.62	15.7	2.08		SSF-A3(1)	60	SSF-A3(2)	60.2	SSF-A3(3)	60.1
1	12	2017-03-24	50	10% WIS	SSF-B1	10	13.62	15.75	2.13		SSF-B1(1)	60	SSF-B1(2)	60	SSF-B1(3)	60
2	//	//	//	//	SSF-B2	//	13.65	15.63	1.98		SSF-B2(1)	60.1	SSF-B2(2)	60	SSF-B2(3)	60
3	//	//	//	//	SSF-B3	//	13.63	15.56	1.93		SSF-B3(1)	60.1	SSF-B3(2)	60.1	SSF-B3(3)	60.1
												Weight (mg)
1	19	2017-05-16	NONE	NONE	Glucose Std 1	NONE	NONE	NONE	NONE		Glc 1 Not Autoclaved	15.21
2	//	//	//	//	Glucose Std 2	//	//	//	//		Glc 2Not Autoclaved	15.17
3	//	//	//	//	Glucose Std 3	//	//	//	//		Glc 3Not Autoclaved	15.78
1	19	2017-05-16	NONE	NONE	Glucose Std 1	NONE	NONE	NONE	NONE		Glc 1 Autoclaved	15
2	//	//	//	//	Glucose Std 2	//	//	//	//		Glc 2 Autoclaved	15
3	//	//	//	//	Glucose Std 3	//	//	//	//		Glc 3 Autoclaved	15
1	19	2017-05-16	NONE	NONE	Glucose Std 1	NONE	NONE	NONE	NONE		Glc 1 Acid treated	15.06
2	//	//	//	//	Glucose Std 2	//	//	//	//		Glc 2 Acid treated	15.16
3	//	//	//	//	Glucose Std 3	//	//	//	//		Glc 3 Acid treated	15.24

## Sheet: 2 Raw data HPLC 
HPLC data
Detector	refractive index (Dionex)
Column	Rezex ROA H+ (8%) (Phenomenex)		Column temperature			80 °C
Mobile phase	5 mM H2SO4		Flow rate			0.8 mL/min
Sample Name	Variable	Retention time	Area	Height	Amount
	Unit	min	µRIU*min	µRIU	g/L
	Analyte	Glucose	Glucose	Glucose	Glucose
	Detector	RI_1	RI_1	RI_1	RI_1
StdA 1x		7.371	6.0926	32.2027	1.4966
StdA 1.3x		7.368	4.6621	24.599	1.1432
StdA 2x		7.372	3.1226	16.4438	0.7642
StdA 4x		7.366	1.5529	8.136	0.3781
StdA 8x		7.367	0.7951	4.1341	0.1921
StdA 16x		7.371	0.3898	2.037	0.0947
BLK1-1 from 09-May-2017 run		7.371	1.5014	8.0205	1.8638
BLK1-2		7.369	1.3851	7.3833	1.7157
BLK1-3		7.37	1.3723	7.3284	1.703
BLK2-1		7.366	1.4774	7.8723	1.8294
BLK2-2		7.372	1.3963	7.4371	1.7282
BLK2-3		7.37	1.4986	7.9859	1.8558
BLK3-1		7.366	1.2462	6.6161	1.5374
BLK3-2		7.362	1.3756	7.3161	1.7001
BLK3-3		7.367	1.4807	7.8745	1.8299
0% 1-1		7.364	0.8118	4.3037	1.0001
0% 1-2		7.362	0.833	4.4426	1.0324
0% 1-3		7.37	0.8404	4.4615	1.0368
0% 2-1		7.363	0.8015	4.2577	0.9894
0% 2-2		7.368	0.7607	4.0359	0.9379
0% 2-3		7.365	0.8265	4.3851	1.019
0% 3-1		7.361	0.8216	4.3545	1.0119
0% 3-2		7.369	0.8116	4.3104	1.0016
0% 3-3		7.367	0.7985	4.2353	0.9842
A 1-1		7.363	0.8687	4.5705	1.0621
A 1-2		7.364	0.9416	4.9928	1.1602
A 1-3		7.367	0.9034	4.7574	1.1055
A 2-1		7.367	0.936	4.9491	1.1501
A 2-2		7.364	0.9503	5.0015	1.1622
A 2-3		7.366	0.9403	4.9622	1.1531
A 3-1		7.359	0.8836	4.6536	1.0814
A 3-2		7.361	0.8682	4.5812	1.0646
A 3-3		7.364	0.8815	4.631	1.0762
B 1-1		7.359	0.8989	4.7392	1.1013
B 1-2		7.363	0.8348	4.4087	1.0245
B 1-3		7.361	0.9069	4.7684	1.1081
B 2-1		7.364	0.9021	4.7431	1.1022
B 2-2		7.365	0.9035	4.7603	1.1062
B 2-3		7.365	0.6043	3.163	0.735
B 3-1		7.358	0.0904	0.4741	0.1102
B 3-2		7.365	0.8643	4.5398	1.055
B 3-3		7.364	0.7762	4.0815	0.9484
Glc1		7.36	0.678	3.4883	0.8106
Glc2		7.367	0.7174	3.6712	0.8531
Glc3		7.359	0.6285	3.2107	0.7461
A 1-1 from 10-May-2017 run		7.364	0.7568	4.1498	0.9643
A 1-2		7.364	0.82	4.2951	0.9981
A 1-3		7.364	0.8134	4.2557	0.9889
A 2-1		7.357	0.5784	3.0147	0.7005
A 2-2		7.36	0.8061	4.2185	0.9803
A 2-3		7.358	0.815	4.2738	0.9931
A 3-1		7.363	0.8062	4.2098	0.9783
A 3-2		7.358	0.8191	4.2968	0.9985
A 3-3		7.367	0.7686	4.0314	0.9368
B 1-1		7.365	0.9266	4.8139	1.1186
B 1-2		7.365	0.9417	4.9324	1.1462
B 1-3		7.361	0.9579	5.0237	1.1674
B 2-1		7.36	0.9518	4.9949	1.1607
B 2-2		7.365	0.9657	5.0495	1.1734
B 2-3		7.359	0.9643	5.0459	1.1726
B 3-1		7.365	0.9439	4.9372	1.1473
B 3-2		7.361	0.8848	4.6196	1.0735
B 3-3		7.365	0.9502	4.972	1.1554
C 1-1		7.361	0.8684	4.53	1.0527
C 1-2		7.36	0.8613	4.4925	1.044
C 1-3		7.36	0.8441	4.4116	1.0252
C 2-1		7.365	0.9337	4.8902	1.1364
C 2-2		7.358	0.8251	4.3452	1.0097
C 2-3		7.365	0.9293	4.8605	1.1295
C 3-1		7.362	0.8569	4.472	1.0392
C 3-2		7.361	0.8578	4.4775	1.0405
C 3-3		7.362	0.8292	4.3651	1.0143
Glc1		7.363	0.7108	3.6836	0.856
Glc2		7.364	0.6652	3.4474	0.8011
Glc3		7.359	0.5755	2.9682	0.6897
40% 1-1 from 16-May-2017 run		7.356	0.9102	4.7153	1.0957
40% 1-2		7.358	0.8974	4.6022	1.0694
40% 1-3		7.356	0.9007	4.6549	1.0817
40% 2-1		7.361	0.9043	4.6254	1.0748
40% 2-2		7.355	0.9025	4.6397	1.0782
40% 2-3		7.357	0.9001	4.5972	1.0683
40% 3-1		7.355	0.9011	4.596	1.068
40% 3-2		7.355	0.9209	4.7066	1.0937
40% 3-3		7.36	0.9018	4.5583	1.0593
A 1-1 week 11 (2017)		7.352	0.8282	4.1791	0.9711
A 1-2		7.357	0.8282	4.1822	0.9719
A 1-3		7.357	0.8288	4.1741	0.97
A 2-1		7.351	0.8038	4.0396	0.9387
A 2-2		7.352	0.8037	4.0333	0.9373
A 2-3		7.356	0.7978	4.0079	0.9314
A 3-1		7.356	0.8399	4.214	0.9793
A 3-2		7.358	0.8342	4.1698	0.969
A 3-3		7.355	0.8147	4.0782	0.9477
A 1-1 week 12 (2017)		7.351	0.7303	3.6479	0.8477
A 1-2		7.355	0.7256	3.6168	0.8405
A 1-3		7.354	0.7248	3.615	0.8401
A 2-1		7.353	0.7183	3.582	0.8324
A 2-2		7.354	0.7289	3.6151	0.8401
A 2-3		7.353	0.7363	3.6547	0.8493
A 3-1		7.349	0.7487	3.7011	0.8601
A 3-2		7.354	0.7408	3.6778	0.8546
A 3-3		7.353	0.7465	3.6916	0.8578
B 1-1		7.356	0.7146	3.5273	0.8197
B 1-2		7.356	0.7921	3.9233	0.9117
B 1-3		7.356	0.796	3.9364	0.9147
B 2-1		7.357	0.7502	3.7031	0.8605
B 2-2		7.349	0.7434	3.679	0.8549
B 2-3		7.358	0.7477	3.6937	0.8583
B 3-1		7.352	0.8023	3.9822	0.9254
B 3-2		7.353	0.7997	3.9356	0.9145
B 3-3		7.351	0.7988	3.9744	0.9236
Glc1 Not Autoclaved		7.356	0.676	3.3593	0.7806
Glc2 Not Autoclaved		7.353	0.6967	3.3709	0.7833
Glc3 Not Autoclaved		7.353	0.7408	3.5702	0.8296
Glc1 Autoclaved		7.35	0.6957	3.4082	0.792
Glc2 Autoclaved		7.353	0.6707	3.1511	0.7322
Glc3 Autoclaved		7.355	0.6861	3.2195	0.7481
Glc1 Acid Treated		7.354	0.6695	3.2358	0.7519
Glc2 Acid Treated		7.359	0.6615	3.287	0.7638
Glc3 Acid Treated		7.354	0.6707	3.2847	0.7633

## Sheet: 3 Sugar recovery standards
Sugar recovery standards
Amount of liquid used [mL]	17.4			Conditions	Explanation
				Acid treated	Glucose treated along samples with acid, afterwards autoclaved
				Autoclaved	Glucose autoclaved, but not acid treated
				Not autoclaved	Glucose acid treated, but not autoclaved
	Weight	Glucose conc. before	Glucose conc. after	% Recovery
	[mg]	[g/L]	[g/L]	[%]
Glc 1 Acid treated	15.06	0.865517	0.7519	86.8729
Glc 2 Acid treated	15.16	0.871264	0.7638	87.6657
Glc 3 Acid treated	15.24	0.875862	0.7633	87.1484
			Average recovery [%]	87.229
			Standard deviation [%]	0.402492
Glc 1 Autoclaved	15	0.862069	0.792	91.872
Glc 2 Autoclaved	15	0.862069	0.7322	84.9352
Glc 3 Autoclaved	15	0.862069	0.7481	86.7796
			Average recovery [%]	87.8623
			Standard deviation [%]	3.5929
Glc1 not autoclaved	15.21	0.874138	0.7806	89.2994
Glc2 not autoclaved	15.17	0.871839	0.7833	89.8446
Glc3 not autoclaved	15.78	0.906897	0.8296	91.4768
			Average recovery [%]	90.2069
			Standard deviation [%]	1.13303
Glc 1 (10.05.2017) autoclaved	15.4	0.885057	0.856	96.7169
Glc 2 autoclaved	14.9	0.856322	0.8011	93.5513
Glc 3 autoclaved	14.9	0.856322	0.6897	80.5421
			Average recovery [%]	90.2701
			Standard deviation [%]	8.57205
Glc1 (09.05.2017) autoclaved	15.1	0.867816	0.8106	93.4069
Glc2 autoclaved	15.1	0.867816	0.8531	98.3042
Glc3 autoclaved	15.2	0.873563	0.7461	85.4088
			Average recovery [%]	92.3733
			Standard deviation [%]	6.50955

## Sheet: 4 Amount of released glucose
Amount of released glucose
Recovery [%]	87.229
Standard deviation of recovery [%]	0.402492
Volume [mL]	17.4
			* outlier
Sample name	Glucose concentration	Adjusted glucose concentration	Adjusted amount of glucose
	[g/L]	[g/L]	[g]
BLK1-1 from 09-May-2017 run	1.8638	2.13667	0.619636
BLK1-2	1.7157	1.96689	0.572306
BLK1-3	1.703	1.95233	0.565234
BLK2-1	1.8294	2.09724	0.608199
BLK2-2	1.7282	1.98122	0.573598
BLK2-3	1.8558	2.1275	0.618006
BLK3-1	1.5374	1.76249	0.511121
BLK3-2	1.7001	1.94901	0.563334
BLK3-3	1.8299	2.09781	0.606344
0% 1-1	1.0001	1.14652	0.332491
0% 1-2	1.0324	1.18355	0.340393
0% 1-3	1.0368	1.1886	0.342978
0% 2-1	0.9894	1.13426	0.329483
0% 2-2	0.9379	1.07522	0.311813
0% 2-3	1.019	1.16819	0.338775
0% 3-1	1.0119	1.16005	0.335855
0% 3-2	1.0016	1.14824	0.33299
0% 3-3	0.9842	1.12829	0.327205
A 1-1	1.0621	1.2176	0.352516
A 1-2	1.1602	1.33006	0.387008
A 1-3	1.1055	1.26735	0.365099
A 2-1	1.1501	1.31848	0.38236
A 2-2	1.1622	1.33235	0.386383
A 2-3	1.1531	1.32192	0.383358
A 3-1	1.0814	1.23973	0.36012
A 3-2	1.0646	1.22047	0.355119
A 3-3	1.0762	1.23376	0.357792
B 1-1	1.1013	1.26254	0.366747
B 1-2	1.0245	1.17449	0.339472
B 1-3	1.1081	1.27033	0.367784
B 2-1	1.1022	1.26357	0.365826
B 2-2	1.1062	1.26816	0.368995
B 2-3 *	0.735	0.84261	0.243545
B 3-1 *	0.1102	0.126334	0.0365152
B 3-2	1.055	1.20946	0.350743
B 3-3	0.9484	1.08725	0.314256
A 1-1 from 10-May-2017 run	0.9643	1.10548	0.320589
A 1-2	0.9981	1.14423	0.331274
A 1-3	0.9889	1.13368	0.328221
A 2-1 *	0.7005	0.803059	0.232887
A 2-2	0.9803	1.12382	0.325909
A 2-3	0.9931	1.1385	0.329067
A 3-1	0.9783	1.12153	0.325244
A 3-2	0.9985	1.14469	0.330857
A 3-3	0.9368	1.07395	0.311967
B 1-1	1.1186	1.28237	0.371888
B 1-2	1.1462	1.31401	0.38043
B 1-3	1.1674	1.33832	0.388112
B 2-1	1.1607	1.33064	0.385884
B 2-2	1.1734	1.34519	0.390106
B 2-3	1.1726	1.34428	0.38984
B 3-1	1.1473	1.31527	0.380795
B 3-2	1.0735	1.23067	0.356894
B 3-3	1.1554	1.32456	0.384122
C 1-1	1.0527	1.20682	0.349979
C 1-2	1.044	1.19685	0.346509
C 1-3	1.0252	1.1753	0.340836
C 2-1	1.1364	1.30278	0.377805
C 2-2	1.0097	1.15753	0.335683
C 2-3	1.1295	1.29487	0.374887
C 3-1	1.0392	1.19135	0.344916
C 3-2	1.0405	1.19284	0.345923
C 3-3	1.0143	1.1628	0.337212
40% 1-1 from 16-May-2017 run	1.0957	1.25612	0.364274
40% 1-2	1.0694	1.22597	0.355531
40% 1-3	1.0817	1.24007	0.35962
40% 2-1	1.0748	1.23216	0.357326
40% 2-2	1.0782	1.23606	0.358456
40% 2-3	1.0683	1.22471	0.355165
40% 3-1	1.068	1.22436	0.354475
40% 3-2	1.0937	1.25383	0.36361
40% 3-3	1.0593	1.21439	0.352173
A 1-1 week 11 (2017)	0.9711	1.11328	0.322313
A 1-2	0.9719	1.11419	0.323116
A 1-3	0.97	1.11202	0.321948
A 2-1	0.9387	1.07613	0.311559
A 2-2	0.9373	1.07453	0.311613
A 2-3	0.9314	1.06776	0.309136
A 3-1	0.9793	1.12268	0.325035
A 3-2	0.969	1.11087	0.322152
A 3-3	0.9477	1.08645	0.315071
A 1-1 week 12 (2017)	0.8477	0.97181	0.280889
A 1-2	0.8405	0.963556	0.278503
A 1-3	0.8401	0.963097	0.280232
A 2-1	0.8324	0.95427	0.276278
A 2-2	0.8401	0.963097	0.278833
A 2-3	0.8493	0.973644	0.281887
A 3-1	0.8601	0.986025	0.285947
A 3-2	0.8546	0.97972	0.283175
A 3-3	0.8578	0.983388	0.284708
B 1-1	0.8197	0.93971	0.272516
B 1-2	0.9117	1.04518	0.303102
B 1-3	0.9147	1.04862	0.3041
B 2-1	0.8605	0.986484	0.285604
B 2-2	0.8549	0.980064	0.284219
B 2-3	0.8583	0.983962	0.285349
B 3-1	0.9254	1.06089	0.307145
B 3-2	0.9145	1.04839	0.303527
B 3-3	0.9236	1.05882	0.306547

## Sheet: 5 No pre-adapt. X=5mg
No pre-adaptation, inoculum size: 5 mg
Fermentation date			27-01-2017
Raw data									Calculations
Process time	Glucose	Lactate	Cell count	Liquid volume											Lactate production			Yield			Productivity
[h]	[g/L]	[g/L]	[CFU/g]	[L]		WIS and media			Glucose release
0	11.5723	0.1394	50000	1.35		WISsolid substrate	0.4226		Glucose in liquid phase t = -0.5 h 1)			Amount of glucose in liquid phase t = tend			Total lactate produced			Yield g(lactate,produced) / g(glucose,consumed)	1.12893		Process time	Vliquid phase 5)	Glucose	Cells	Lactate	Volumetric productivity	Specific productivity	ln(Lactate)	ln(LactateStart)
3	17.4416	0.121	0	1.3284		Msolids used [g]	354.946											Yield g(lactate,produced) / g(glucose, released)	1.06309		[h]	[kg]	[g]	[CFU]	[g]	[glactate/(Lliquid fraction*h)]	[glactate/(CFU*h)
6	21.4305	0.1351	0	1.3068		Vliquid phase, t = -0.5 h 1) [L]	1.14505		cGlc, liquid phase of solids3) [g/L]	6.8		mGlc,liquid phase, t=-t_end 5) [g]	1.6782		Lactate at t=0 [g]	0.18819		Yield g(lactate,produced) / gWIS	0.265276		0	1.35	15.6226	75000000	0.18819			-1.6703	-1.6703
9	24.9701	0.1621	0	1.2852		Total mass [g]	1500		Vliquid phase in solid substrate 4) [L]	0.204946					Lactate at t=tend [g]	37.0612					3	1.3284	23.1694	0	0.160736	-0.000716667	NaN	-1.82799	-1.6703
12	27.9163	0.2689	1050000	1.2636																	6	1.3068	28.0054	0	0.176549	0.00685	NaN	-1.73416	-1.6703
15	28.5135	1.0678	3050000	1.242					cGlc,t=-0.5 [g/L]	2.83501		Released glucose from solids 2)			Total lactate produced [g]	39.7914					9	1.2852	32.0916	0	0.208331	0.0223	NaN	-1.56863	-1.6703
21	17.301	11.3505	31500000	1.2204		Sampling 6)			mGlc,t=-0.5 [g]	3.82727											12	1.2636	35.275	1474200000	0.339782	0.15095	1.29386e-10	-1.07945	-1.6703
24	15.3327	17.413	5.95e+07	1.1988		Number of samplings	12					Glucose in solids [g] at t = -0.5 h	87.2963								15	1.242	35.4138	4209000000	1.32621	0.748794	2.20956e-10	0.282323	-1.6703
27	11.8708	21.6344	18000000	1.1772		Sampling volume [L]	0.0216					Glucose in solids [g] at t = tend	49.8664								21	1.2204	21.1141	42714000000	13.8522	1.91848	5.48138e-11	2.62844
30	10.3359	26.0061	44600000	1.1556		Glucose sampled away [g]	4.33205					Released glucose [g]	37.4299								24	1.1988	18.3808	7.9254e+10	20.8747	1.71398	2.59258e-11	3.03854
33	7.7654	27.1543	63000000	1.134		Lactate sampled away [g]	2.91834														27	1.1772	13.9743	23544000000	25.468	1.43218	7.16092e-11	3.23742
36	6.108	29.6556	68000000	1.1124								Total glucose consumed [g]	35.2469								30	1.1556	11.9442	57266400000	30.0526	0.919983	1.85647e-11	3.40295
45	1.5385	33.9762		1.0908																	33	1.134	8.80596	79380000000	30.793	0.60825	8.68929e-12	3.42729
																					36	1.1124	6.79454	84048000000	32.9889			3.49617
1) t=-0.5 denotes is time point before enzyme addition.																					Total mass [g]		1500		Maximum	1.91848	2.20956e-10
2) All changes in WIS due to depletion of cellulose to glucose																									Average	0.819894	7.57063e-11
3) The glucose concentration in the medium at t= -0.5 h is determined only by the glucose concentration of the liquid phase in the solid substrate
4) The volume of the liquid phase before enzyme addition is 1.15 L and not changed by base titration.
5) The final liquid volume is assumed to be the liquid volume - sampling
6) The sampling volume is 24 g.

## Sheet: 6 No pre-adapt. X=10mg
No pre-adaptation, inoculum: 10 mg
Fermentation dates
	03-03-2017	B
	07-04-2017	A
03-03-2017; B
Raw data									Calculations
Process time	Glucose	Lactate	Cell count	Liquid volume											Lactate production			Yield			Productivity
[h]	[g/L]	[g/L]	[CFU/g]	[L]		WIS and media			Glucose release
0	11.2402	0.4026	238000000	1.35		WISsolid substrate	0.4226		Glucose in liquid phase t = -0.5 h 1)			Amount of glucose in liquid phase t = tend			Total lactate produced			Yield g(lactate,produced) / g(glucose,consumed)	1.18434		Process time	Vliquid phase 5)	Glucose	Cells	Lactate	Volumetric productivity	Specific productivity	ln(lactate)	Average ln(lactate)
3	18.8885	2.2697	109000000	1.3284		Msolids used [g]	354.946											Yield g(lactate,produced) / g(glucose, released)	1.24909		[h]	[kg]	[g]	[CFU]	[g]	[glactate/(Lliquid fraction*h)]	[glactate/(CFU*h)
6	17.511	7.5813	144000000	1.3068		Vliquid phase, t = -0.5 h 1) [L]	1.14505		cGlc, liquid phase of solids3) [g/L]	6.8		mGlc,liquid phase, t=-t_end 5) [g]	0.16241		Lactate at t=0 [g]	0.54351		Yield g(lactate,produced) / gWIS	0.285508		0	1.35	15.1743	357000000000	0.54351			-0.609707	-0.690981
9	13.4325	13.3662	215000000	1.2852		Total mass [g]	1500		Vliquid phase in solid substrate 4) [L]	0.204946					Lactate at t=tend [g]	38.6492					3	1.3284	25.0915	160884000000	3.01507	1.19645	9.87894e-12	1.10362	0.85208
12	10.1299	19.1427	355000000	1.2636																	6	1.3068	22.8834	209088000000	9.90724	1.84942	1.15589e-11	2.29327	2.0588
15	7.3011	22.6289	430000000	1.242		Sampling 6)			cGlc,t=-0.5 [g/L]	2.83501		Released glucose from solids 2)			Total lactate produced [g]	42.8261					9	1.2852	17.2634	307020000000	17.1782	1.9269	8.06609e-12	2.84364	2.74334
21	3.0653	27.1428	243000000	1.2204		Number of samplings	10		mGlc,t=-0.5 [g]	3.82727											12	1.2636	12.8001	498420000000	24.1887	1.54378	3.91382e-12	3.18589	3.10528
24	0	30.0199	617000000	1.1988		Sampling volume [L]	0.0216					Glucose in solids [g] at t = -0.5 h	87.2963								15	1.242	9.06797	593400000000	28.1051	1.02548	2.14636e-12	3.33595	3.25963
27	0.9074	31.7326	144000000	1.1772		Glucose sampled away [g]	1.79041					Glucose in solids [g] at t = tend	53.0105								21	1.2204	3.74089	329508000000	33.1251	0.890128	3.29677e-12	3.50029	3.45969
30	0.2685	32.8549	145000000	1.1556		Lactate sampled away [g]	4.72041					Released glucose [g]	34.2858								24	1.1988	0	821844000000	35.9879	0.764967	1.11583e-12	3.58318	3.52874
33	0.1448	31.3959		1.134																	27	1.1772	1.06819	188352000000	37.3556	0.4725	2.95313e-12	3.62048	3.5598
48	0.146	34.744		1.1124								Total glucose consumed [g]	36.1603								30	1.1556	0.310279	186180000000	37.9671			3.63672	3.58796
1) t=-0.5 denotes is time point before enzyme addition.																					Total mass [g]		1500		Maximum	1.9269	1.15589e-11
2) All changes in WIS due to depletion of cellulose to glucose																									Average	1.23405	5.36622e-12
3) The glucose concentration in the medium at t= -0.5 h is determined only by the glucose concentration of the liquid phase in the solid substrate
4) The volume of the liquid phase before enzyme addition is 1.15 L and not changed by base titration.
5) The final liquid volume is assumed to be the liquid volume - sampling
6) The sampling volume is 24 g.
07-04-2017; A
Raw data									Calculations
Process time	Glucose	Lactate	Cell count	Liquid volume											Lactate production			Yield			Productivity
[h]	[g/L]	[g/L]	[CFU/g]	[L]		WIS and media			Glucose release
0	11.8188	0.3422	3.045e+08	1.35		WISsolid substrate	0.4226		Glucose in liquid phase t = -0.5 h 1)			Amount of glucose in liquid phase t = tend			Total lactate produced			Yield g(lactate,produced) / g(glucose,consumed)	1.2796		Process time	Vliquid phase 5)	Glucose	Cells	Lactate	Volumetric productivity	Specific productivity	ln(Lactate)
3	18.2072	1.3724	1.34e+08	1.3284		Msolids used [g]	354.946											Yield g(lactate,produced) / g(glucose, released)	1.2301		[h]	[kg]	[g]	[CFU]	[g]	[glactate/(Lliquid fraction*h)]	[glactate/(CFU*h)
6	20.2875	4.7434	1.18e+08	1.3068		Vliquid phase, t = -0.5 h 1) [L]	1.14505		cGlc, liquid phase of solids3) [g/L]	6.8		mGlc,liquid phase, t=-t_end 5) [g]	0.210306		Lactate at t=0 [g]	0.46197		Yield g(lactate,produced) / gWIS	0.260784		0	1.35	15.9554	4.5675e+11	0.46197			-0.772255
9	15.9192	10.9366	360000000	1.2852		Total mass [g]	1500		Vliquid phase in solid substrate 4) [L]	0.204946					Lactate at t=tend [g]	34.7323					3	1.3284	24.1864	1.97784e+11	1.8231	0.733533	4.92672e-12	0.600536
12	11.1565	16.2927	340000000	1.2636																	6	1.3068	26.5117	1.71336e+11	6.19868	1.59403	1.21579e-11	1.82434
15	7.1226	19.4253	610000000	1.242		Sampling 6)			cGlc,t=-0.5 [g/L]	2.83501		Released glucose from solids 2)			Total lactate produced [g]	39.1175					9	1.2852	20.4594	514080000000	14.0557	1.92488	4.81221e-12	2.64303
21	2.6721	25.0258	169000000	1.2204		Number of samplings	10		mGlc,t=-0.5 [g]	3.82727											12	1.2636	14.0974	477360000000	20.5875	1.41478	3.74501e-12	3.02468
24	1.1807	26.9231	7.55e+07	1.1988		Sampling volume [L]	0.0216					Glucose in solids [g] at t = -0.5 h	87.2963								15	1.242	8.84627	841800000000	24.1262	1.00727	1.48614e-12	3.1833
27	0.1546	28.1056	1.6e+08	1.1772		Glucose sampled away [g]	1.91875					Glucose in solids [g] at t = tend	55.4959								21	1.2204	3.26103	229164000000	30.5415	0.732761	3.90228e-12	3.41909
30	0.1264	29.8021	20000000	1.1556		Lactate sampled away [g]	4.84723					Released glucose [g]	31.8004								24	1.1988	1.41542	1.00566e+11	32.2754	0.5133	6.11881e-12	3.47431
33	0.1531	30.5092		1.134																	27	1.1772	0.181995	2.0928e+11	33.0859	0.479833	2.69906e-12	3.49911
36	0.0324	30.9303		1.1124								Total glucose consumed [g]	30.5701								30	1.1556	0.146068	25680000000	34.4393			3.5392
53	0.1928	31.8411		1.0908
																					Total mass [g]		1500		Maximum	1.92488	1.21579e-11
1) t=-0.5 denotes is time point before enzyme addition.																									Average	0.981997	4.98101e-12
2) All changes in WIS due to depletion of cellulose to glucose
3) The glucose concentration in the medium at t= -0.5 h is determined only by the glucose concentration of the liquid phase in the solid substrate
4) The volume of the liquid phase before enzyme addition is 1.15 L and not changed by base titration.
5) The final liquid volume is assumed to be the liquid volume - sampling																		Averages
6) The sampling volume is 24 g.																		Yield				Productivity
																				STD			Volumetric productivity	STD	Specific productivity	STD
																		Yield g(lactate,produced) / g(glucose,consumed)	1.23197	0.0476284			[glactate/(Lliquid fraction*h)]		[1011*glactate/(CFU*h)
																		Yield g(lactate,produced) / g(glucose, released)	1.23959	0.00949832		Maximum	1.92589	0.00100833	1.18584	0.0299514
																		Yield g(lactate,produced) / gWIS	0.273146	0.012362		Average	1.10803	0.126029	0.517362	0.0192606

## Sheet: 7 30% adapt. X=5mg
30% adaptation, inoculum: 5mg
Fermentation date
Raw data									Calculations
Process time	Glucose	Lactate	Cell count	Liquid volume											Lactate production			Yield			Productivity
[h]	[g/L]	[g/L]	[CFU/g]	[L]		WIS and media			Glucose release
0	11.8173	0.2768	260000000	1.35		WISsolid substrate	0.4226		Glucose in liquid phase t = -0.5 h 1)			Amount of glucose in liquid phase t = tend			Total lactate produced			Yield g(lactate,produced) / g(glucose,consumed)	1.20535		Process time	Vliquid phase 5)	Glucose	Cells	Lactate	Volumetric productivity	Specific productivity	ln(Lactate)
3	18.7736	2.2687	20000000	1.3284		Msolids used [g]	354.946											Yield g(lactate,produced) / g(glucose, released)	1.29131		[h]	[kg]	[g]	[CFU]	[g]	[glactate/(Lliquid fraction*h)]	[glactate/(CFU*h)
6	17.1466	8.8511	155000000	1.3068		Vliquid phase, t = -0.5 h 1) [L]	1.14505		cGlc, liquid phase of solids3) [g/L]	6.8		mGlc,liquid phase, t=-t_end 5) [g]	0.221214		Lactate at t=0 [g]	0.37368		Yield g(lactate,produced) / gWIS	0.259655		0	1.35	15.9534	390000000000	0.37368			-0.984355
9	11.229	16.6774	555000000	1.2852		Total mass [g]	1500		Vliquid phase in solid substrate 4) [L]	0.204946					Lactate at t=tend [g]	33.8756					3	1.3284	24.9389	29520000000	3.01374	1.42905	6.43072e-11	1.10318
12	5.8953	22.0824	280000000	1.2636																	6	1.3068	22.4072	225060000000	11.5666	2.40145	1.39439e-11	2.44812
15	1.792	25.6288	460000000	1.242		Sampling 6)			cGlc,t=-0.5 [g/L]	2.83501		Released glucose from solids 2)			Total lactate produced [g]	38.9483					9	1.2852	14.4315	792540000000	21.4338	2.20522	3.57603e-12	3.06497
21	0.1061	28.3862	305000000	1.2204		Number of samplings	10		mGlc,t=-0.5 [g]	3.82727											12	1.2636	7.4493	393120000000	27.9033	1.4919	4.79539e-12	3.32875
24	0.0153	28.356	425000000	1.1988		Sampling volume [L]	0.0216					Glucose in solids [g] at t = -0.5 h	87.2963								15	1.242	2.22566	634800000000	31.831	0.941278	1.84163e-12	3.46044
27	0.1538	28.6573	1000000	1.1772		Glucose sampled away [g]	1.45504					Glucose in solids [g] at t = tend	57.1345								21	1.2204	0.129484	413580000000	34.6425	0.146478	4.3223e-13	3.54508
30	0.1547	30.0182	0	1.1556		Lactate sampled away [g]	5.44643					Released glucose [g]	30.1618								24	1.1988	0.0183416	566100000000	33.9932	0.0451833	9.56824e-14	3.52616
33	0.1508	30.3809		1.134																	27	1.1772	0.181053	1308000000	33.7354	0.277033	2.4933e-10	3.51855
36	0.1283	30.5656		1.1124								Total glucose consumed [g]	32.3128								30	1.1556	0.178771	0	34.689			3.54642
53	0.2028	31.0557		1.0908
																					Total mass [g]		1500		Maximum	2.40145	6.43072e-11
1) t=-0.5 denotes is time point before enzyme addition.																									Average	1.16997	1.48161e-11
2) All changes in WIS due to depletion of cellulose to glucose
3) The glucose concentration in the medium at t= -0.5 h is determined only by the glucose concentration of the liquid phase in the solid substrate
4) The volume of the liquid phase before enzyme addition is 1.15 L and not changed by base titration.
5) The final liquid volume is assumed to be the liquid volume - sampling
6) The sampling volume is 24 g.

## Sheet: 8 30% adapt. X=10
30% pre-adaptation, inoculum: 10 mg
Fermentation dates
	07-04-2017	B
	10-03-2017	A
10-03-2017; A
Raw data									Calculations
Process time	Glucose	Lactate	Cell count	Liquid volume											Lactate production			Yield			Productivity
[h]	[g/L]	[g/L]	[CFU/g]	[L]		WIS and media			Glucose release
0	9.2694	0.3398	103000000	1.35		WISsolid substrate	0.4226		Glucose in liquid phase t = -0.5 h 1)			Amount of glucose in liquid phase t = tend			Total lactate produced			Yield g(lactate,produced) / g(glucose,consumed)	0.906334		Process time	Vliquid phase 5)	Glucose	Cells	Lactate	Volumetric productivity	Specific productivity	ln(Lactate)	Average ln(Lactate)
3	13.7064	5.3726	103000000	1.3284		Msolids used [g]	354.946											Yield g(lactate,produced) / g(glucose, released)	0.979751		[h]	[kg]	[g]	[CFU]	[g]	[glactate/(Lliquid fraction*h)]	[glactate/(CFU*h)
6	7.2994	14.1884	164000000	1.3068		Vliquid phase, t = -0.5 h 1) [L]	1.14505		cGlc, liquid phase of solids3) [g/L]	6.8		mGlc,liquid phase, t=-t_end 5) [g]	0.0314118		Lactate at t=0 [g]	0.45873		Yield g(lactate,produced) / gWIS	0.251389		0	1.35	12.5137	154500000000	0.45873			-0.779293	-0.631568
9	1.0601	21.7979	235000000	1.2852		Total mass [g]	1500		Vliquid phase in solid substrate 4) [L]	0.204946					Lactate at t=tend [g]	33.8421					3	1.3284	18.2076	152028000000	7.13696	2.3081	2.01679e-11	1.96529	1.95273
12	0.0175	23.7999	870000000	1.2636																	6	1.3068	9.53886	238128000000	18.5414	2.73755	1.50231e-11	2.92001	2.92882
15	0.0199	24.884	495000000	1.242		Sampling 6)			cGlc,t=-0.5 [g/L]	2.83501		Released glucose from solids 2)			Total lactate produced [g]	37.7083					9	1.2852	1.36244	335580000000	28.0147	1.60192	6.135e-12	3.33273	3.35493
21	0	25.6849	233000000	1.2204		Number of samplings	10		mGlc,t=-0.5 [g]	3.82727											12	1.2636	0.022113	1221480000000	30.0736	0.51435	5.32086e-13	3.40365	3.48057
24	0	27.5036	1200000000	1.1988		Sampling volume [L]	0.0216					Glucose in solids [g] at t = -0.5 h	87.2963								15	1.242	0.0247158	683100000000	30.9059	0.285406	5.18919e-13	3.43095	3.49367
27	0	28.2424	34000000	1.1772		Glucose sampled away [g]	0.678175					Glucose in solids [g] at t = tend	48.8087								21	1.2204	0	315948000000	31.3459	0.44865	1.73298e-12	3.44508	3.5124
30	0.0243	28.4177	8300000	1.1556		Lactate sampled away [g]	4.32499					Released glucose [g]	38.4877								24	1.1988	0	1598400000000	32.9713	0.42625	3.19688e-13	3.49564	3.54383
33	0.0277	29.8431		1.134																	27	1.1772	0	44472000000	33.247	0.15235	4.03279e-12	3.50396	3.53959
												Total glucose consumed [g]	41.6053								30	1.1556	0.0280811	10657200000	32.8395			3.49163	3.55117
1) t=-0.5 denotes is time point before enzyme addition.
2) All changes in WIS due to depletion of cellulose to glucose																					Total mass [g]		1500		Maximum	2.73755	2.01679e-11
3) The glucose concentration in the medium at t= -0.5 h is determined only by the glucose concentration of the liquid phase in the solid substrate																									Average	1.63628	1.04645e-11
4) The volume of the liquid phase before enzyme addition is 1.15 L and not changed by base titration.
5) The final liquid volume is assumed to be the liquid volume - sampling
6) The sampling volume is 24 g.
07-04-2017; B
Raw data									Calculations
Process time	Glucose	Lactate	Cell count	Liquid volume											Lactate production			Yield			Productivity
[h]	[g/L]	[g/L]	[CFU/g]	[L]		WIS and media			Glucose release
0	12.4594	0.4566	2.415e+08	1.35		WISsolid substrate	0.4226		Glucose in liquid phase t = -0.5 h 1)			Amount of glucose in liquid phase t = tend			Total lactate produced			Yield g(lactate,produced) / g(glucose,consumed)	1.13981		Process time	Vliquid phase 5)	Glucose	Cells	Lactate	Volumetric productivity	Specific productivity	ln(Lactate)
3	16.1058	5.2393	5.85e+07	1.3284		Msolids used [g]	354.946											Yield g(lactate,produced) / g(glucose, released)	1.22973		[h]	[kg]	[g]	[CFU]	[g]	[glactate/(Lliquid fraction*h)]	[glactate/(CFU*h)
6	10.7956	14.4406	375000000	1.3068		Vliquid phase, t = -0.5 h 1) [L]	1.14505		cGlc, liquid phase of solids3) [g/L]	6.8		mGlc,liquid phase, t=-t_end 5) [g]	0.127187		Lactate at t=0 [g]	0.61641		Yield g(lactate,produced) / gWIS	0.284755		0	1.35	16.8202	3.6225e+11	0.61641			-0.483843
9	4.63	22.7876	750000000	1.2852		Total mass [g]	1500		Vliquid phase in solid substrate 4) [L]	0.204946					Lactate at t=tend [g]	37.1329					3	1.3284	21.3949	8.6346e+10	6.95989	2.33067	3.58564e-11	1.94016
12	0.2553	27.7579	525000000	1.2636																	6	1.3068	14.1077	544500000000	18.871	2.92472	7.01932e-12	2.93763
15	0	28.2097	480000000	1.242		Sampling 6)			cGlc,t=-0.5 [g/L]	2.83501		Released glucose from solids 2)			Total lactate produced [g]	42.7132					9	1.2852	5.95048	1071000000000	29.2866	2.21955	2.66346e-12	3.37713
21	0.0216	29.3869	21500000	1.2204		Number of samplings	10		mGlc,t=-0.5 [g]	3.82727											12	1.2636	0.322597	737100000000	35.0749	0.903683	1.54917e-12	3.55749
24	0	30.2864	4.5e+06	1.1988		Sampling volume [L]	0.0216					Glucose in solids [g] at t = -0.5 h	87.2963								15	1.242	0	662400000000	35.0364	0.1658	3.10875e-13	3.55639
27	0	30.3282	8e+07	1.1772		Glucose sampled away [g]	0.959815					Glucose in solids [g] at t = tend	52.5625								21	1.2204	0.0263606	29154000000	35.8638	0.265289	1.11051e-11	3.57973
30	0	32.0116	1e+06	1.1556		Lactate sampled away [g]	6.19673					Released glucose [g]	34.7338								24	1.1988	0	5.994e+09	36.3073	0.156883	3.13767e-11	3.59202
33	0.0031	32.8973		1.134																	27	1.1772	0	1.0464e+11	35.7024	0.287533	3.23475e-12	3.57522
36	0.1651	33.0834		1.1124								Total glucose consumed [g]	37.4741								30	1.1556	0	1.284e+09	36.9926			3.61072
48	0.1166	34.0419		1.0908
																					Total mass [g]		1500		Maximum	2.92472	3.58564e-11
1) t=-0.5 denotes is time point before enzyme addition.																									Average	1.85021	1.17721e-11
2) All changes in WIS due to depletion of cellulose to glucose
3) The glucose concentration in the medium at t= -0.5 h is determined only by the glucose concentration of the liquid phase in the solid substrate
4) The volume of the liquid phase before enzyme addition is 1.15 L and not changed by base titration.
5) The final liquid volume is assumed to be the liquid volume - sampling																		Averages
6) The sampling volume is 24 g.																		Yield				Productivity
																				STD			Volumetric productivity	STD	Specific productivity	STD
																		Yield g(lactate,produced) / g(glucose,consumed)	1.02307	0.116736			[glactate/(Lliquid fraction*h)]		[1011*glactate/(CFU*h)
																		Yield g(lactate,produced) / g(glucose, released)	1.10474	0.124989		Maximum	2.83113	0.0935833	2.80121	0.784427
																		Yield g(lactate,produced) / gWIS	0.268072	0.0166829		Average	1.74324	0.106963	1.11183	0.0653784

## Sheet: 9 40% adapt., X=5mg
40% adaptation, inoculum: 5 mg
Fermentation date			27-01-2017
Raw data									Calculations
Process time	Glucose	Lactate	Cell count	Liquid volume											Lactate production			Yield			Productivity
[h]	[g/L]	[g/L]	[CFU/g]	[L]		WIS and media			Glucose release
0	9.8806	0.2178	5600000	1.35		WISsolid substrate	0.4226		Glucose in liquid phase t = -0.5 h 1)			Amount of glucose in liquid phase t = tend			Total lactate produced			Yield g(lactate,produced) / g(glucose,consumed)	1.15161		Process time	Vliquid phase 5)	Glucose	Cells	Lactate	Volumetric productivity	Specific productivity	ln(Lactate)	ln(LactateStart)
3	16.8194	0.461	100000	1.3284		Msolids used [g]	354.946											Yield g(lactate,produced) / g(glucose, released)	1.17246		[h]	[kg]	[g]	[CFU]	[g]	[glactate/(Lliquid fraction*h)]	[glactate/(CFU*h)
6	21.052	0.6687	100000	1.3068		Vliquid phase, t = -0.5 h 1) [L]	1.14505		cGlc, liquid phase of solids3) [g/L]	6.8		mGlc,liquid phase, t=-t_end 5) [g]	0.28569		Lactate at t=0 [g]	0.29403		Yield g(lactate,produced) / gWIS	0.262782		0	1.35	13.3388	8400000000	0.29403			-1.22407	-1.22407
9	24.9308	0.7883	0	1.2852		Total mass [g]	1500		Vliquid phase in solid substrate 4) [L]	0.204946					Lactate at t=tend [g]	34.8984					3	1.3284	22.3429	147600000	0.612392	0.07515	6.7635e-10	-0.490382	-1.22407
12	26.7175	1.5249	6550000	1.2636																	6	1.3068	27.5108	145200000	0.873857	0.05455	4.9095e-10	-0.134838	-1.22407
15	23.3597	6.0092	8.05e+07	1.242		Sampling 6)			cGlc,t=-0.5 [g/L]	2.83501		Released glucose from solids 2)			Total lactate produced [g]	39.4172					9	1.2852	32.0411	0	1.01312	0.1427	NaN	0.0130378	-1.22407
21	7.7577	21.2061	17100000	1.2204		Number of samplings	10		mGlc,t=-0.5 [g]	3.82727											12	1.2636	33.7602	9196200000	1.92686	0.87015	1.19563e-10	0.655894	-1.22407
24	4.0823	27.9634	274000000	1.1988		Sampling volume [L]	0.0216					Glucose in solids [g] at t = -0.5 h	87.2963								15	1.242	29.0127	1.1109e+11	7.46343	1.84078	2.05802e-11	2.01001
27	0.5857	32.0039	98000000	1.1772		Glucose sampled away [g]	2.9327					Glucose in solids [g] at t = tend	53.6772								21	1.2204	9.4675	23187600000	25.8799	2.34589	1.23468e-10	3.25347
30	0.1086	35.5031	17800000	1.1556		Lactate sampled away [g]	4.8129					Released glucose [g]	33.6192								24	1.1988	4.89386	364968000000	33.5225	1.79963	5.9112e-12	3.51222
33	0.0747	33.2192		1.134																	27	1.1772	0.689486	128184000000	37.675	1.25662	1.15404e-11	3.629
36	0.0774	33.564		1.1124								Total glucose consumed [g]	34.228								30	1.1556	0.125498	22855200000	41.0274			3.71424
45	0.3268	29.6899		1.0908
48	0.2672	32.6397		1.0692																	Total mass [g]		1500		Maximum	2.34589	6.7635e-10
																									Average	1.17618	2.06909e-10
1) t=-0.5 denotes is time point before enzyme addition.
2) All changes in WIS due to depletion of cellulose to glucose
3) The glucose concentration in the medium at t= -0.5 h is determined only by the glucose concentration of the liquid phase in the solid substrate
4) The volume of the liquid phase before enzyme addition is 1.15 L and not changed by base titration.
5) The final liquid volume is assumed to be the liquid volume - sampling
6) The sampling volume is 24 g.

[truncated: 4 more sheets: 10 40% adapt. X=10mg, 11 50% adapt. X=10mg, 12 Overview, 13 Additional graphs]
